# Supplementary material for: Mammographic texture and risk of breast cancer by tumor type and estrogen receptor status
Source: PubMed Central journal article supplement (PMC5139106; doi:10.1186/s13058-016-0778-1), 2016-12-06
Supplement: 13058_2016_778_MOESM1_ESM.pdf [file 13058_2016_778_MOESM1_ESM.pdf]

**Table S1.** Baseline characteristics of study population by site\*\*

|                                                            | MMHS          |               | NHS                 |                     | NHSII              |                     | MCMAM              |                    | SFMR               |                    |
|------------------------------------------------------------|---------------|---------------|---------------------|---------------------|--------------------|---------------------|--------------------|--------------------|--------------------|--------------------|
|                                                            | Cases         | Controls      | Cases               | Controls            | Cases              | Controls            | Cases              | Controls           | Cases              | Controls           |
| <b>N</b>                                                   | 62            | 112           | 412                 | 454                 | 351                | 492                 | 242                | 395                | 104                | 206                |
| <b>Mean age at mammogram (SD)</b>                          | 55.8 (9.3)    | 53.3 (7.2)    | 58.6 (7.7)          | 58.3 (7.7)          | 45.5 (4.3)         | 45.9 (4.3)          | 64.1 (10.1)        | 64.1 (10.1)        | 55.5 (11.3)        | 55.5 (11.3)        |
| <b>Mean age at diagnosis (SD)</b>                          | 58.3 (9.3)    | --            | 66 (6.9)            | --                  | 49.7 (4.3)         | --                  | 67.8 (10.1)        | --                 | 59.8 (11.3)        | --                 |
| <b>Mean BMI (SD)</b>                                       | 29.7 (6.7)    | 29.9 (7.9)    | 26.1 (4.9)          | 25.8 (5.4)          | 24.3 (5.8)         | 25.2 (7.7)          | 26.6 (7.6)         | 26.8 (6.8)         | 24.2 (5.6)         | 23.5 (4.7)         |
| <b>Body mass index categories, kg/m<sup>2</sup></b>        |               |               |                     |                     |                    |                     |                    |                    |                    |                    |
| <25                                                        | 16 (26%)      | 36 (32%)      | 186 (45%)           | 230 (51%)           | <b>206 (59%)</b>   | <b>270 (54.9%)</b>  | 80 (33%)           | 163 (41%)          | 63 (61%)           | 155 (75%)          |
| 25-29                                                      | 17 (27%)      | 27 (24%)      | 139 (34%)           | 136 (30%)           | <b>99 (28%)</b>    | <b>111 (22.6%)</b>  | 86 (35%)           | 128 (32%)          | 28 (27%)           | 41 (20%)           |
| 30-34                                                      | 16 (26%)      | 25 (22%)      | 63 (15%)            | 55 (12%)            | <b>25 (7%)</b>     | <b>47 (9.6%)</b>    | 44 (18%)           | 62 (16%)           | 7 (7%)             | 7 (3%)             |
| 35+                                                        | 13 (21%)      | 24 (21%)      | 22 (5%)             | 29 (6%)             | <b>13 (4%)</b>     | <b>48 (9.8%)</b>    | 21 (9%)            | 32 (8%)            | 4 (4%)             | 3 (2%)             |
| Unknown                                                    | 0 (0%)        | 0 (0%)        | 2 (1%)              | 4 (1%)              | <b>8 (2%)</b>      | <b>16 (3.3%)</b>    | 11 (5%)            | 10 (3%)            | 2 (2%)             | 0 (0%)             |
| <b>Menopausal Status</b>                                   |               |               |                     |                     |                    |                     |                    |                    |                    |                    |
| Premenopausal                                              | 18 (29%)      | 42 (37%)      | 75 (18%)            | 99 (22%)            | 266 (76%)          | 361 (73.4%)         | 38 (16%)           | 67 (17%)           | 33 (32%)           | 63 (31%)           |
| Postmenopausal                                             | 44 (71%)      | 69 (62%)      | 336 (82%)           | 355 (78%)           | 55 (16%)           | 89 (18.1%)          | 202 (83%)          | 324 (82%)          | 60 (58%)           | 125 (61%)          |
| Unknown                                                    | 0 (0%)        | 1 (1%)        | 1 (0.2%)            | 0 (0%)              | 30 (8%)            | 42 (8.5%)           | 2 (1%)             | 4 (1%)             | 11 (11%)           | 18 (9%)            |
| <b>Parity</b>                                              |               |               |                     |                     |                    |                     |                    |                    |                    |                    |
| Nulliparous                                                | 5 (8%)        | 18 (16%)      | <b>34 (8%)</b>      | <b>15 (3%)</b>      | 64 (18%)           | 86 (17.5%)          | 33 (14%)           | 48 (12%)           | 33 (32%)           | 51 (25%)           |
| Parous                                                     | 57 (92%)      | 87 (78%)      | <b>371 (90%)</b>    | <b>435 (96%)</b>    | 285 (81%)          | 405 (82.3%)         | 209 (86%)          | 346 (88%)          | 55 (53%)           | 135 (65%)          |
| Unknown                                                    | 0 (0%)        | 7 (6%)        | <b>7 (2%)</b>       | <b>4 (1%)</b>       | 2 (1%)             | 1 (0.2%)            | 0 (0%)             | 1 (0.3%)           | 16 (15%)           | 20 (10%)           |
| <b>Postmenopausal hormone therapy*</b>                     |               |               |                     |                     |                    |                     |                    |                    |                    |                    |
| Not current                                                | 38 (86%)      | 52 (75%)      | 161 (48%)           | 192 (54%)           | <b>11 (20%)</b>    | <b>28 (31.5%)</b>   | --                 | --                 | 45 (75%)           | 95 (76%)           |
| Current, estrogen                                          | 3 (7%)        | 8 (12%)       | 91 (27%)            | 95 (27%)            | <b>18 (33%)</b>    | <b>45 (50.6%)</b>   | --                 | --                 | 4 (7%)             | 8 (6%)             |
| Current, estrogen + progestin                              | 3 (7%)        | 9 (13%)       | 84 (25%)            | 68 (19%)            | <b>26 (47%)</b>    | <b>16 (18%)</b>     | --                 | --                 | 11 (18%)           | 22 (18%)           |
| <b>Family History</b>                                      |               |               |                     |                     |                    |                     |                    |                    |                    |                    |
| No                                                         | 44 (71%)      | 90 (80%)      | 347 (84%)           | 400 (88%)           | <b>298 (85%)</b>   | <b>443 (90%)</b>    | 200 (83%)          | 338 (86%)          | 84 (81%)           | 182 (88%)          |
| Yes                                                        | 18 (29%)      | 22 (20%)      | 65 (16%)            | 54 (12%)            | <b>53 (15%)</b>    | <b>49 (10%)</b>     | 42 (17%)           | 57 (14%)           | 18 (17%)           | 24 (12%)           |
| Unknown                                                    | 0 (0%)        | 0 (0%)        | 0 (0%)              | 0 (0%)              | <b>0 (0%)</b>      | <b>0 (0%)</b>       | 0 (0%)             | 0 (0%)             | 2 (2%)             | 0 (0%)             |
| <b>Standardized Mean % mammographic density (SD)</b>       | 32.5 (19.0)   | 28.8 (17.9)   | <b>29.1 (16)</b>    | <b>24.8 (15.4)</b>  | <b>39.6 (19.3)</b> | <b>33.6 (20.2)</b>  | <b>30 (18.2)</b>   | <b>24.5 (17.9)</b> | <b>32.3 (21.2)</b> | <b>26.7 (17.6)</b> |
| <b>Standardized Mean Dense Area cm<sup>2</sup> (SD)</b>    | 54.7 (38.2)   | 45.8 (28.2)   | <b>71.4 (45.5)</b>  | <b>60.8 (38.6)</b>  | <b>58.5 (34.2)</b> | <b>48.3 (32.6)</b>  | <b>51.8 (36.2)</b> | <b>42.2 (32.4)</b> | <b>80.9 (62.3)</b> | <b>65.2 (51.5)</b> |
| <b>Standardized Mean Nondense Area cm<sup>2</sup> (SD)</b> | 149.6 (113.1) | 152.1 (122.0) | <b>187.8 (87.1)</b> | <b>207.5 (96.0)</b> | <b>98.7 (63.0)</b> | <b>111.6 (73.3)</b> | 138.3 (91.3)       | 145.3 (85.7)       | 194.4 (151.0)      | 194.6 (129.1)      |

Data presentation: mean (standard deviation) or number (%).

\*Among postmenopausal women in MMHS, NHS, NHSII, and SFMR

\*\*Sites generally matched cases and controls on age and date of mammogram

Bold denotes statistically significant difference between cases and controls within study (p-value < 0.05)

**Table S2. Pearson correlation coefficient for top 15 significant features. Correlations calculated using case subjects. Gray and gray with line pattern highlight strength of positive and negative associations respectively.**

|                      | <i>Homogeneity</i> | <i>Energy</i> | <i>FD_TH_75</i> | <i>FD_TH_70</i> | <i>FD_TH_80</i> | <i>FD_TH_65</i> | <i>FD_TH_85</i> | <i>FD_TH_60</i> | <i>Kurtosis</i> | <i>Minkowski FD</i> | <i>FD_TH_15</i> | <i>FD_TH_10</i> | <i>Busyness</i> | <i>PD</i> | <i>Entropy</i> | <i>Dissimilarity</i> |
|----------------------|--------------------|---------------|-----------------|-----------------|-----------------|-----------------|-----------------|-----------------|-----------------|---------------------|-----------------|-----------------|-----------------|-----------|----------------|----------------------|
| <i>Homogeneity</i>   | 1                  | 0.37          | 0.02            | -0.01           | 0.01            | -0.01           | 0.02            | -0.01           | 0.03            | -0.26               | -0.22           | -0.2            | -0.04           | -0.05     | -0.46          | -0.98                |
| <i>Energy</i>        | 0.37               | 1             | 0.2             | 0.18            | 0.23            | 0.15            | 0.25            | 0.11            | 0.13            | -0.19               | -0.17           | -0.2            | -0.09           | -0.01     | -0.82          | -0.33                |
| <i>FD_TH_75</i>      | 0.02               | 0.2           | 1               | 0.94            | 0.95            | 0.89            | 0.88            | 0.82            | 0.37            | 0.43                | -0.06           | -0.11           | -0.42           | -0.32     | -0.41          | -0.04                |
| <i>FD_TH_70</i>      | -0.01              | 0.18          | 0.94            | 1               | 0.88            | 0.96            | 0.79            | 0.91            | 0.42            | 0.5                 | -0.04           | -0.09           | -0.39           | -0.39     | -0.42          | -0.02                |
| <i>FD_TH_80</i>      | 0.01               | 0.23          | 0.95            | 0.88            | 1               | 0.81            | 0.95            | 0.73            | 0.29            | 0.35                | -0.07           | -0.11           | -0.43           | -0.24     | -0.4           | -0.02                |
| <i>FD_TH_65</i>      | -0.01              | 0.15          | 0.89            | 0.96            | 0.81            | 1               | 0.7             | 0.96            | 0.48            | 0.55                | -0.03           | -0.09           | -0.36           | -0.46     | -0.42          | -0.02                |
| <i>FD_TH_85</i>      | 0.02               | 0.25          | 0.88            | 0.79            | 0.95            | 0.7             | 1               | 0.62            | 0.21            | 0.26                | -0.07           | -0.11           | -0.41           | -0.14     | -0.37          | -0.02                |
| <i>FD_TH_60</i>      | -0.01              | 0.11          | 0.82            | 0.91            | 0.73            | 0.96            | 0.62            | 1               | 0.52            | 0.58                | -0.03           | -0.08           | -0.34           | -0.52     | -0.4           | -0.03                |
| <i>Kurtosis</i>      | 0.03               | 0.13          | 0.37            | 0.42            | 0.29            | 0.48            | 0.21            | 0.52            | 1               | 0.38                | -0.3            | -0.5            | -0.27           | -0.34     | -0.53          | -0.06                |
| <i>FD_Minkowski</i>  | -0.26              | -0.19         | 0.43            | 0.5             | 0.35            | 0.55            | 0.26            | 0.58            | 0.38            | 1                   | 0.44            | 0.34            | 0.18            | -0.55     | -0.11          | 0.21                 |
| <i>FD_TH_15</i>      | -0.22              | -0.17         | -0.06           | -0.04           | -0.07           | -0.03           | -0.07           | -0.03           | -0.3            | 0.44                | 1               | 0.85            | 0.62            | -0.15     | 0.19           | 0.25                 |
| <i>FD_TH_10</i>      | -0.2               | -0.2          | -0.11           | -0.09           | -0.11           | -0.09           | -0.11           | -0.08           | -0.5            | 0.34                | 0.85            | 1               | 0.56            | -0.1      | 0.3            | 0.22                 |
| <i>Busyness</i>      | -0.04              | -0.09         | -0.42           | -0.39           | -0.43           | -0.36           | -0.41           | -0.34           | -0.27           | 0.18                | 0.62            | 0.56            | 1               | -0.03     | 0.2            | 0.09                 |
| <i>PD</i>            | -0.05              | -0.01         | -0.32           | -0.39           | -0.24           | -0.46           | -0.14           | -0.52           | -0.34           | -0.55               | -0.15           | -0.1            | -0.03           | 1         | 0.23           | 0.09                 |
| <i>Entropy</i>       | -0.46              | -0.82         | -0.41           | -0.42           | -0.4            | -0.42           | -0.37           | -0.4            | -0.53           | -0.11               | 0.19            | 0.3             | 0.2             | 0.23      | 1              | 0.44                 |
| <i>Dissimilarity</i> | -0.98              | -0.33         | -0.04           | -0.02           | -0.02           | -0.02           | -0.02           | -0.03           | -0.06           | 0.21                | 0.25            | 0.22            | 0.09            | 0.09      | 0.44           | 1                    |
