# Supplementary material for: Mammographic texture and risk of breast cancer by tumor type and estrogen receptor status
Source: Springer Nature journal article supplement (doi:10.1186/s13058-016-0778-1), 2016-12-01
Supplement: MOESM2 [file 11333670]

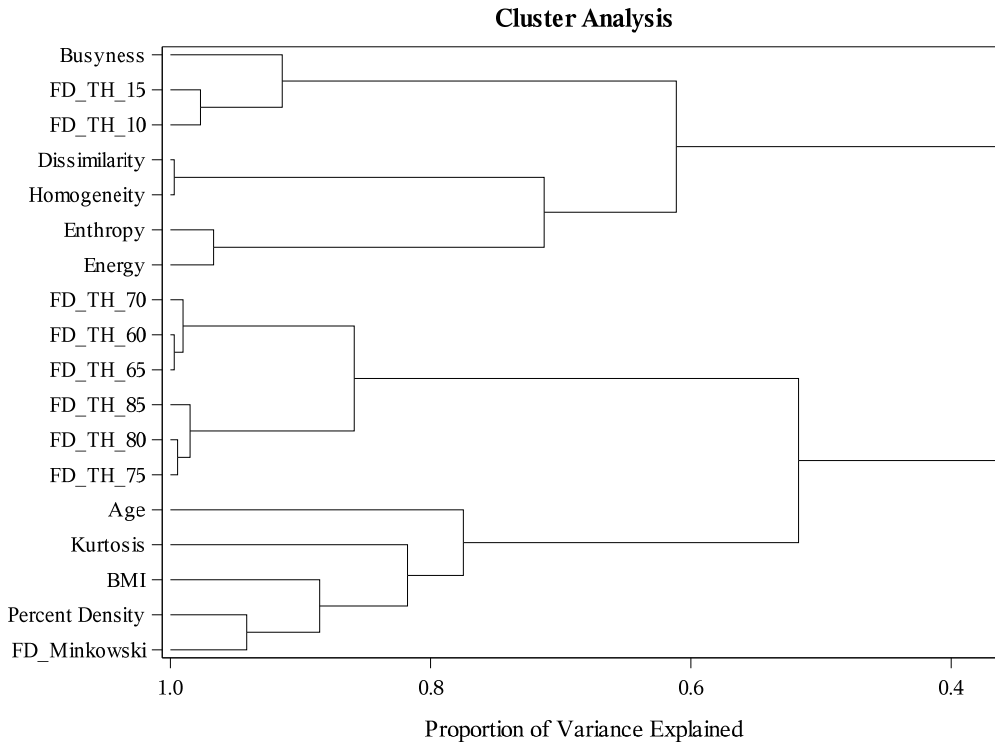

**Figure S1. Dendrogram of cluster analysis of the top 15 features with PD, age and BMI. Similar features cluster together. Percent Density groups closely with BMI and age. The figure is restricted to the cases.**
